# Supplementary material for: Insights into the Mechanism of Action of Helianthus annuus (Sunflower) Seed Essential Oil in the Management of Type-2 Diabetes Mellitus Using Network Pharmacology and Molecular Docking Approaches
Source: MDPI journal article supplement (doi:10.3390/endocrines4020026), 2023-05-02
Supplement: s1 [file s1]

Supplementary Table S1. Docking scores result of SSEO compounds and standards complexed with respective targets or genes (PPARA, FABP4, PPARD, PPARG and CPT2)

| Targets | Compounds          | Docking scores (kcal/mol) |
|---------|--------------------|---------------------------|
| PPARA   | Capric acid        | -5.6                      |
|         | Caproic acid       | -4.8                      |
|         | Caprylic acid      | -5.3                      |
|         | Lauric acid        | -6.0                      |
|         | Linoleic acid      | -6.3                      |
|         | Lignoceric acid    | -6.7                      |
|         | Myristic acid      | -5.6                      |
|         | Arachidic acid     | -5.9                      |
|         | Behenic acid       | -6.5                      |
|         | Palmitic acid      | -6.1                      |
|         | Pentadecyclic acid | -5.8                      |
|         | Phylloquinone      | -9.2                      |
|         | Stearic acid       | -5.7                      |
|         | Oleic acid         | -6.0                      |
|         | Tricosylic acid    | -6.6                      |
|         | Rosiglitazone      | -8.6                      |
|         | Metformin          | -5.2                      |
| FABP4   | Capric acid        | -4.6                      |
|         | Caproic acid       | -4.6                      |
|         | Caprylic acid      | -5.2                      |
|         | Lauric acid        | -5.4                      |
|         | Linoleic acid      | -6.3                      |
|         | Lignoceric acid    | -6.0                      |
|         | Myristic acid      | -5.6                      |
|         | Arachidic acid     | -5.9                      |
|         | Behenic acid       | -5.9                      |
|         | Palmitic acid      | -5.6                      |
|         | Pentadecyclic acid | -5.2                      |
|         | Stearic acid       | -5.8                      |
|         | Oleic acid         | -5.9                      |
|         | Tricosylic acid    | -6.0                      |
|         | Rosiglitazone      | -8.3                      |
|         | Metformin          | -4.5                      |
| PPARD   | Capric acid        | -4.8                      |
|         | Caproic acid       | -4.8                      |
|         | Caprylic acid      | -5.1                      |
|         | Lauric acid        | -5.5                      |
|         | Linoleic acid      | 5.9                       |
|         | Lignoceric acid    | -6.4                      |
|         | Myristic acid      | -5.9                      |
|         | Arachidic acid     | -6.1                      |

|       |                    |      |
|-------|--------------------|------|
|       | Behenic acid       | -5.7 |
|       | Palmitic acid      | -5.8 |
|       | Pentadecyclic acid | -6.3 |
|       | Stearic acid       | -6.3 |
|       | Oleic acid         | -6.4 |
|       | Tricosylic acid    | -7.1 |
|       | Rosiglitazone      | -8.7 |
|       | Metformin          | -5.2 |
|       |                    |      |
| PPARG | Capric acid        | -4.4 |
|       | Caproic acid       | -4.4 |
|       | Caprylic acid      | -5.0 |
|       | Lauric acid        | -5.5 |
|       | Lignoceric acid    | -6.1 |
|       | Myristic acid      | -5.5 |
|       | Arachidic acid     | -5.8 |
|       | Behenic acid       | -5.4 |
|       | Palmitic acid      | -5.8 |
|       | Pentadecyclic acid | -5.6 |
|       | Stearic acid       | -5.8 |
|       | Oleic acid         | -4.2 |
|       | Tricosylic acid    | -5.7 |
|       | Rosiglitazone      | -8.2 |
|       | Metformin          | -4.9 |
|       |                    |      |
| CPT2  | Capric acid        | -4.9 |
|       | Caproic acid       | -5.1 |
|       | Caprylic acid      | -4.8 |
|       | Lauric acid        | -5.1 |
|       | Lignoceric acid    | -5.7 |
|       | Myristic acid      | -5.2 |
|       | Arachidic acid     | -6.2 |
|       | Behenic acid       | -6.1 |
|       | Palmitic acid      | -5.6 |
|       | Pentadecyclic acid | -5.4 |
|       | Stearic acid       | -6.3 |
|       | Tricosylic acid    | -5.7 |
|       | Rosiglitazone      | -9.4 |
|       | Metformin          | -5.3 |

Supplementary Figure S1. GCMS-FAMES chromatogram identifying the sunflower seed essential oil components (Sample 1).

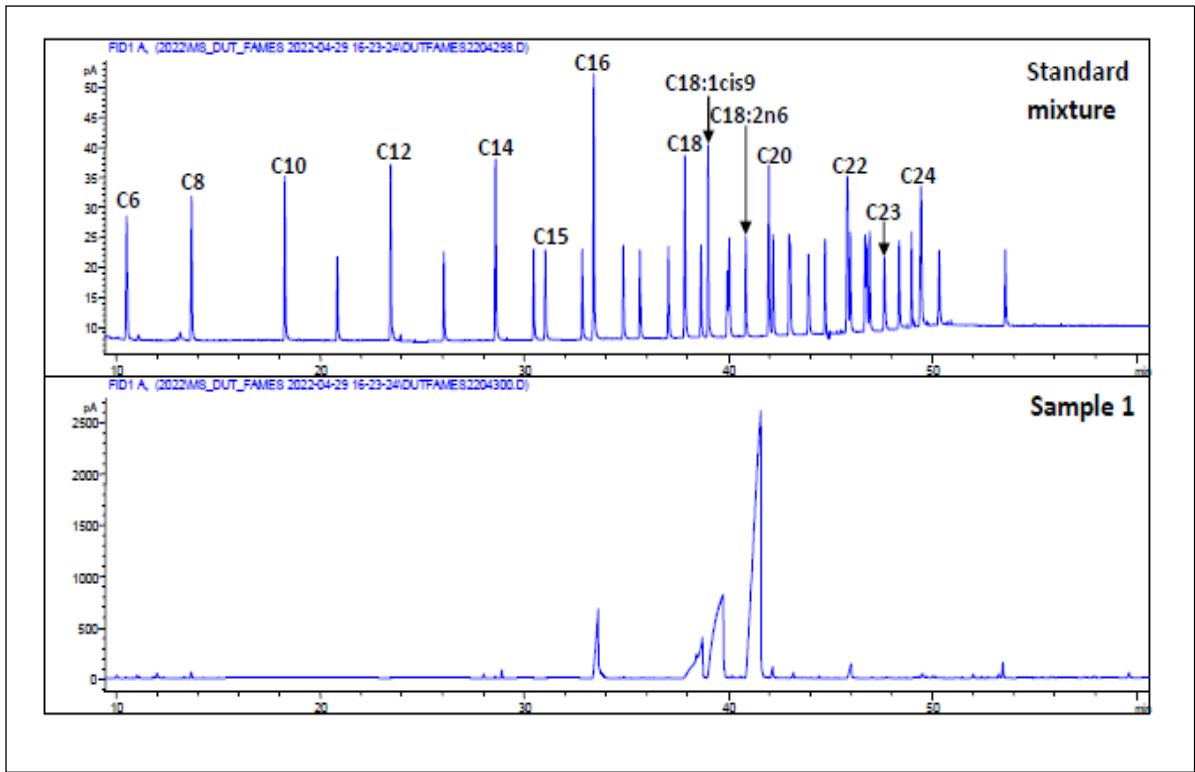

Supplementary Figure S2. GCMS-FAMES chromatogram identifying the sunflower seed essential oil components (Sample 1) with retention times (mins).

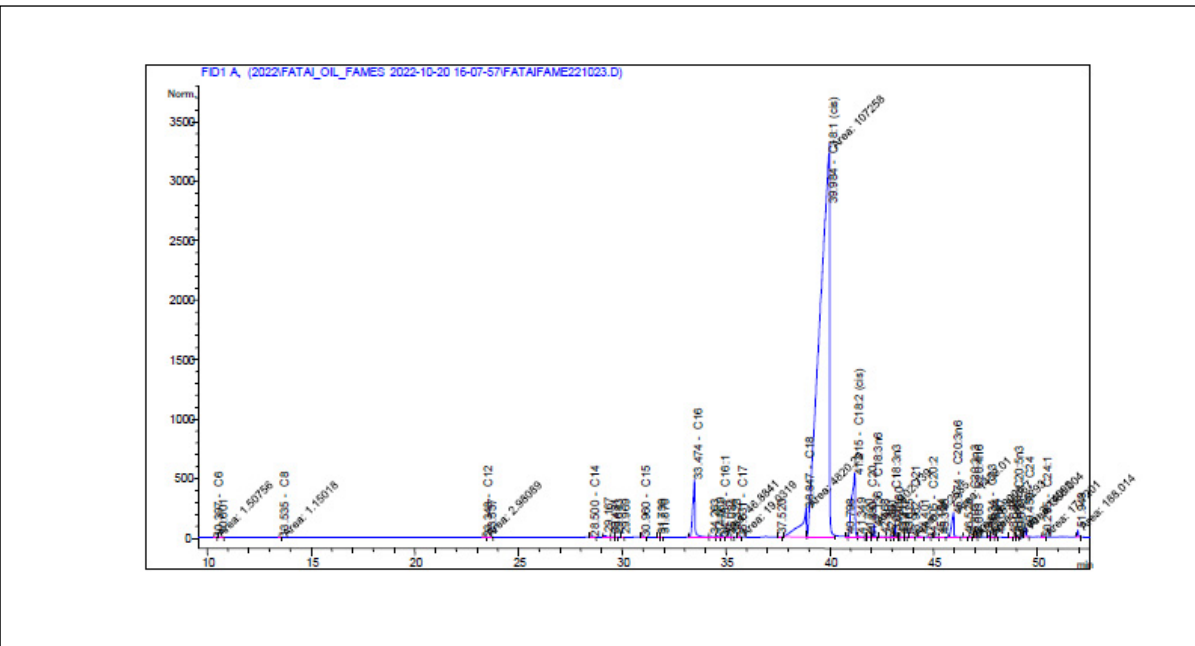

Supplementary Figure S3. Interaction plots between SSEO compounds, metformin, and respective genes over 100 ns.

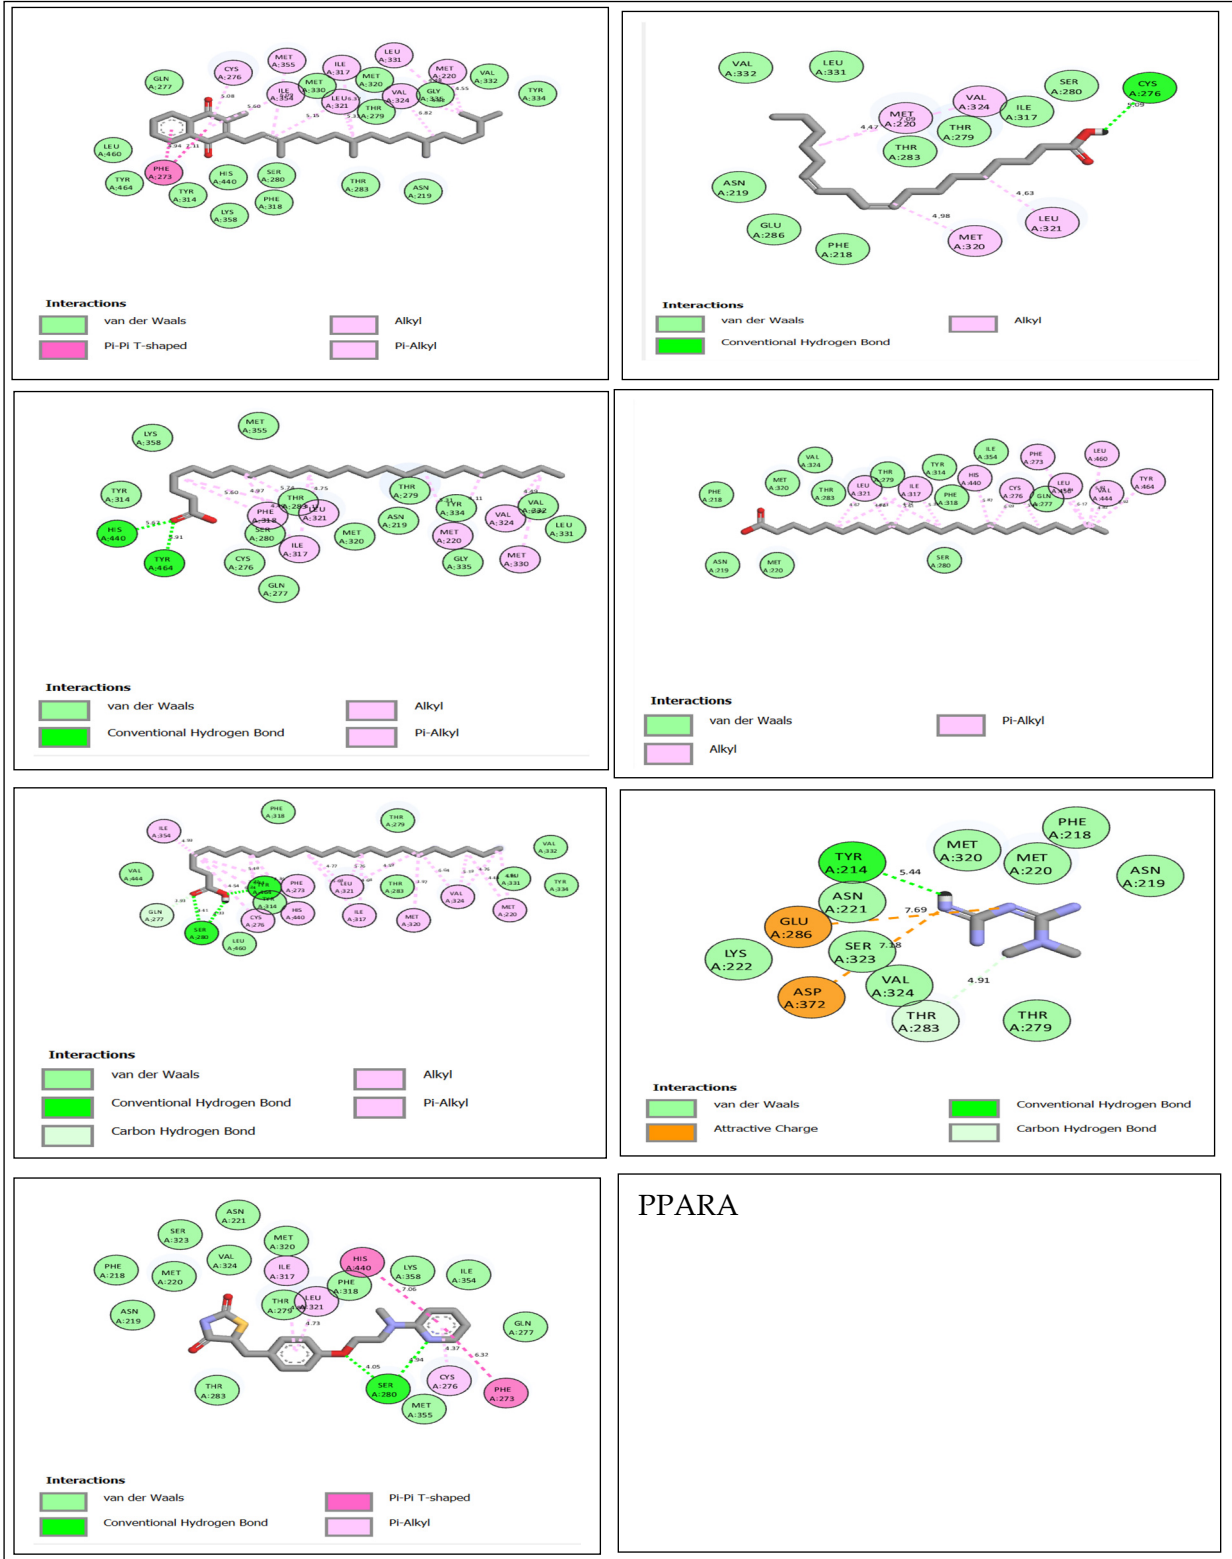

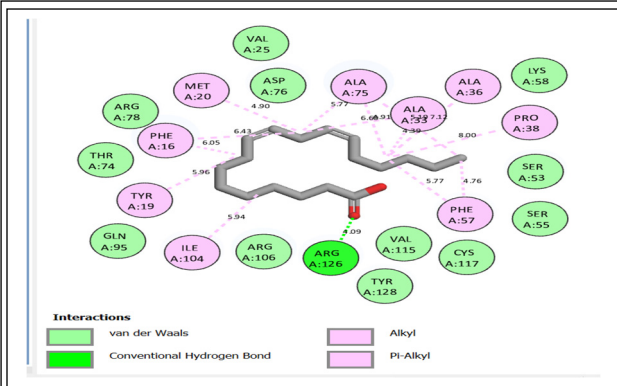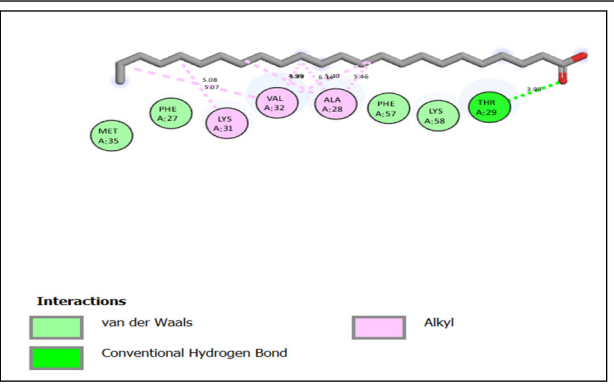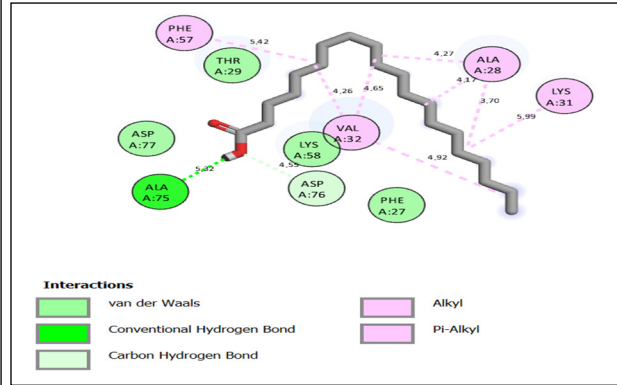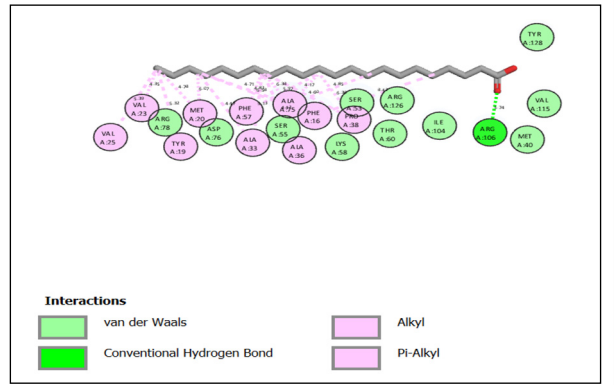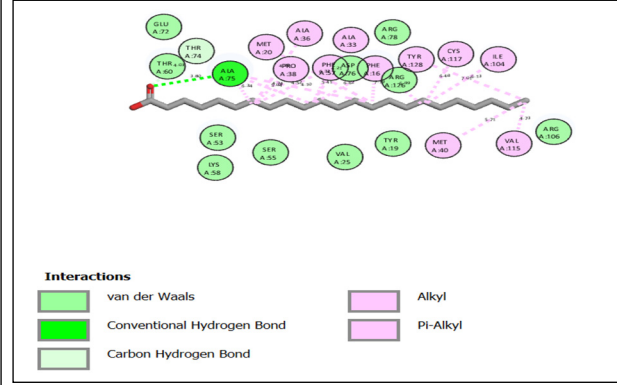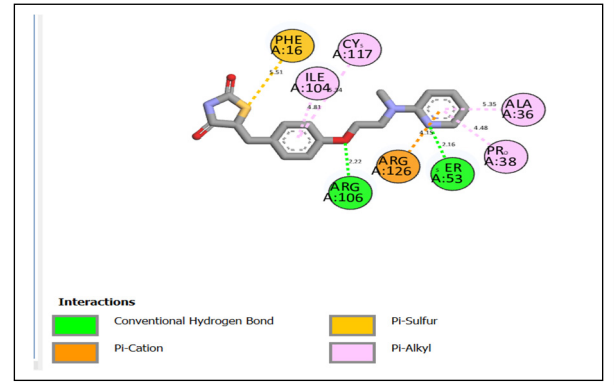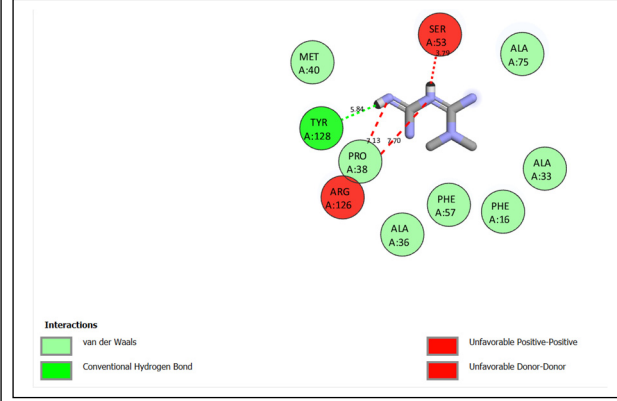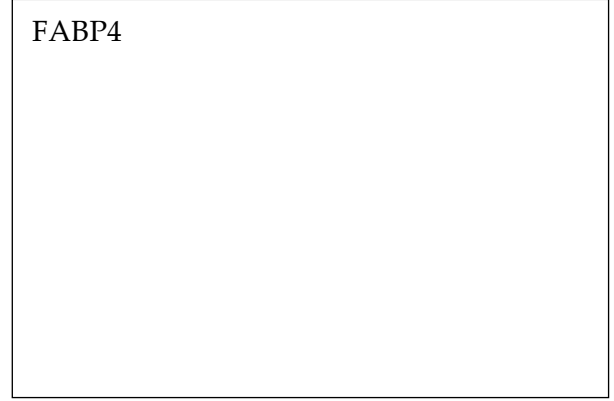

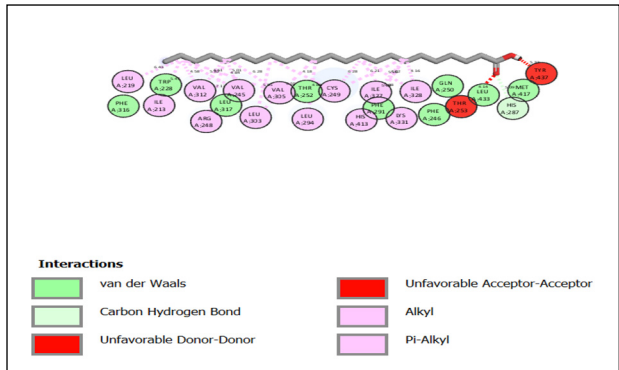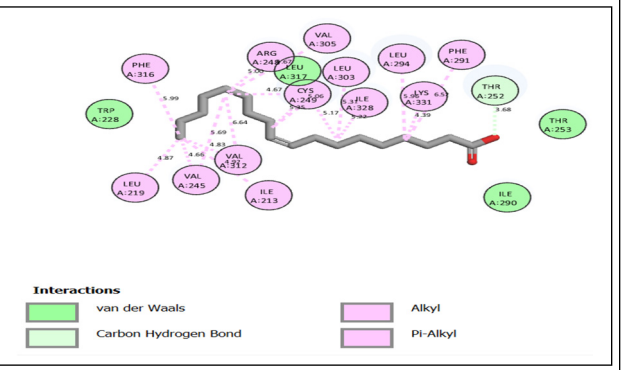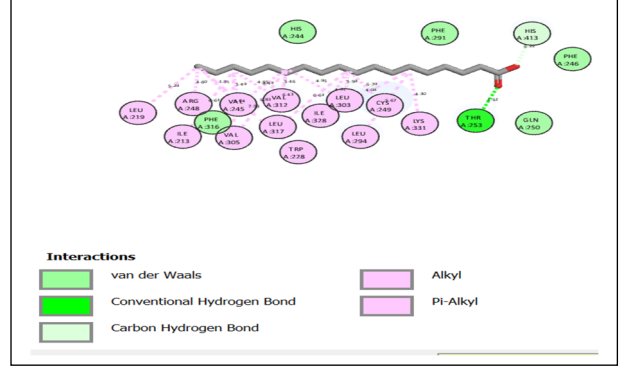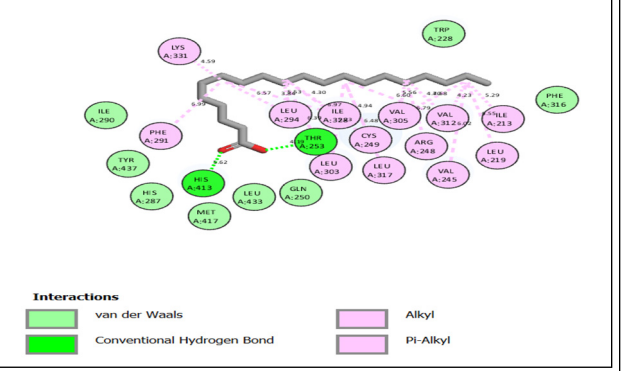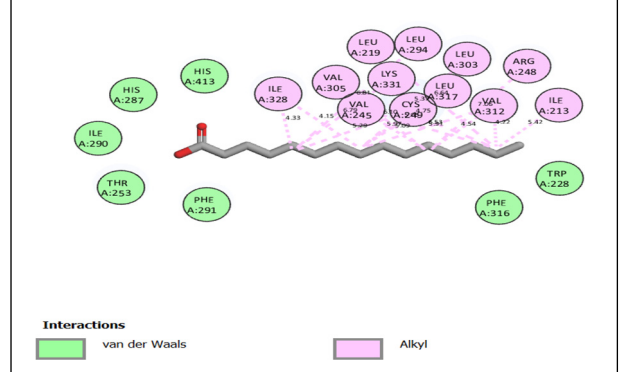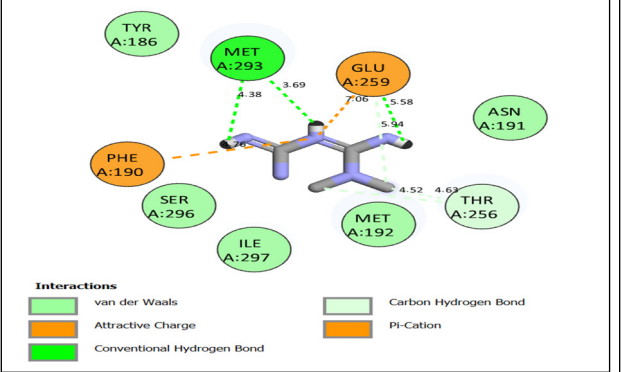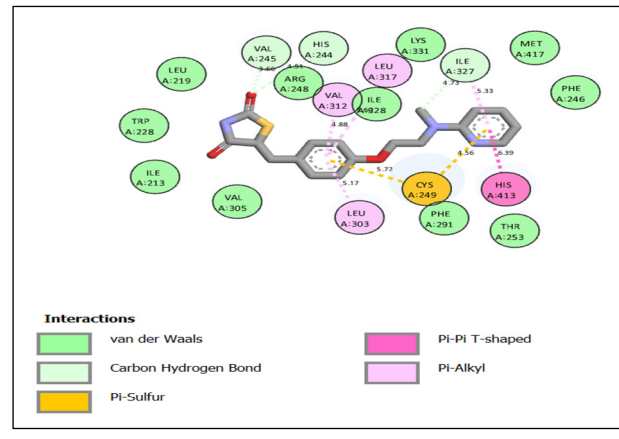

PPARD

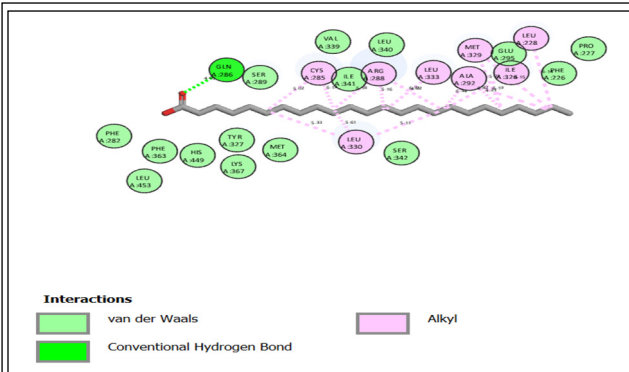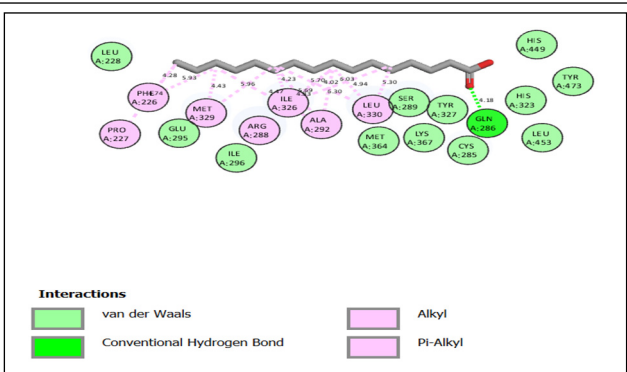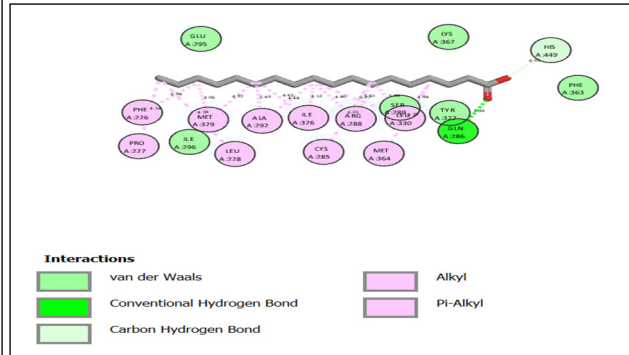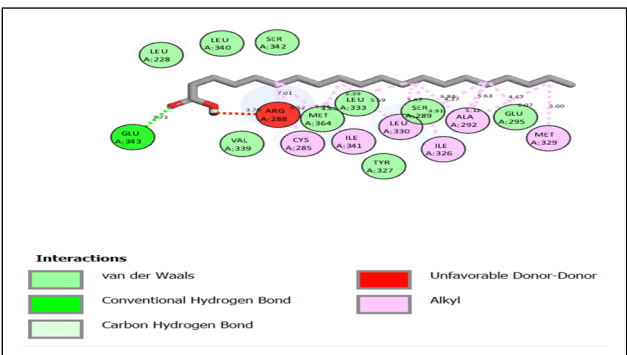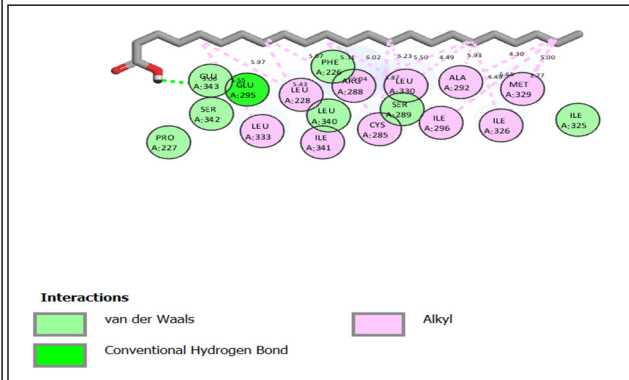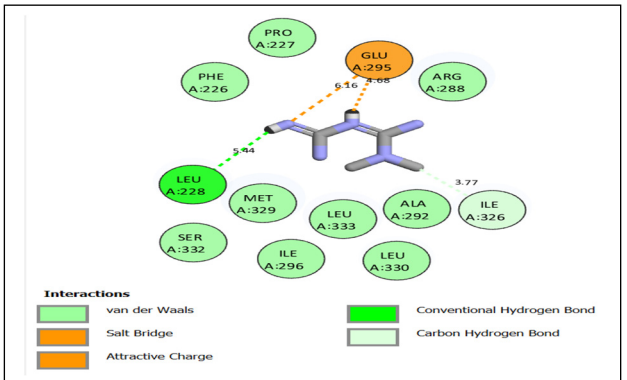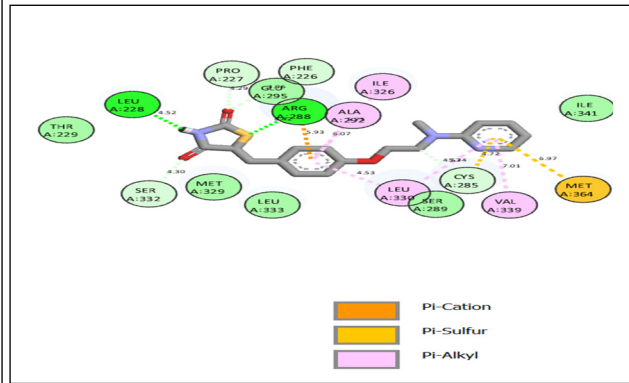

PPARG



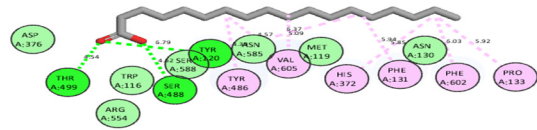

#### Interactions

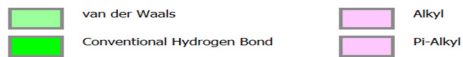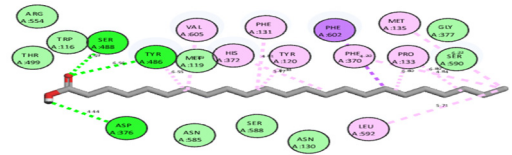

#### Interactions

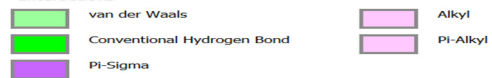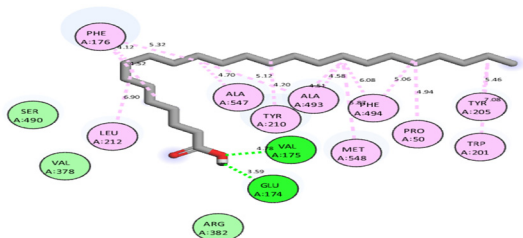

#### Interactions

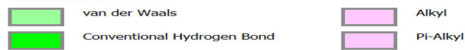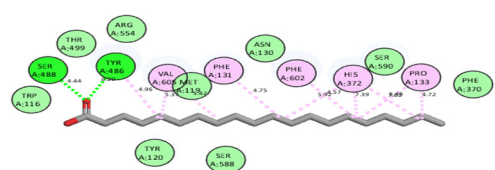

#### Interactions

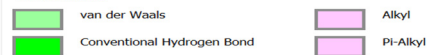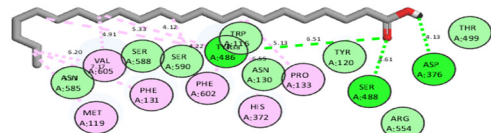

#### Interactions

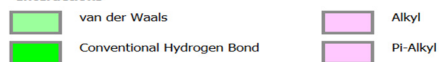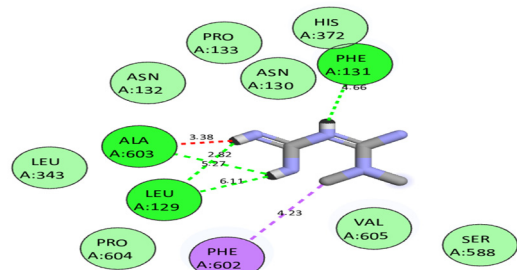

#### Interactions

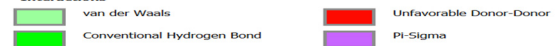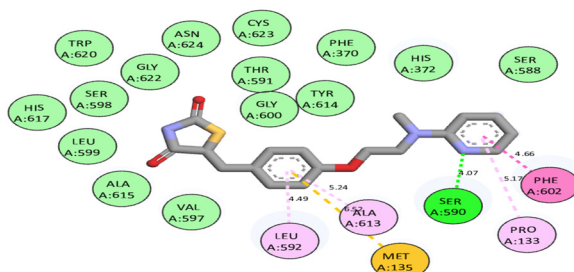

#### Interactions

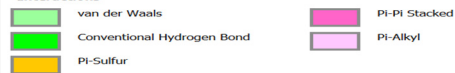

CPT2



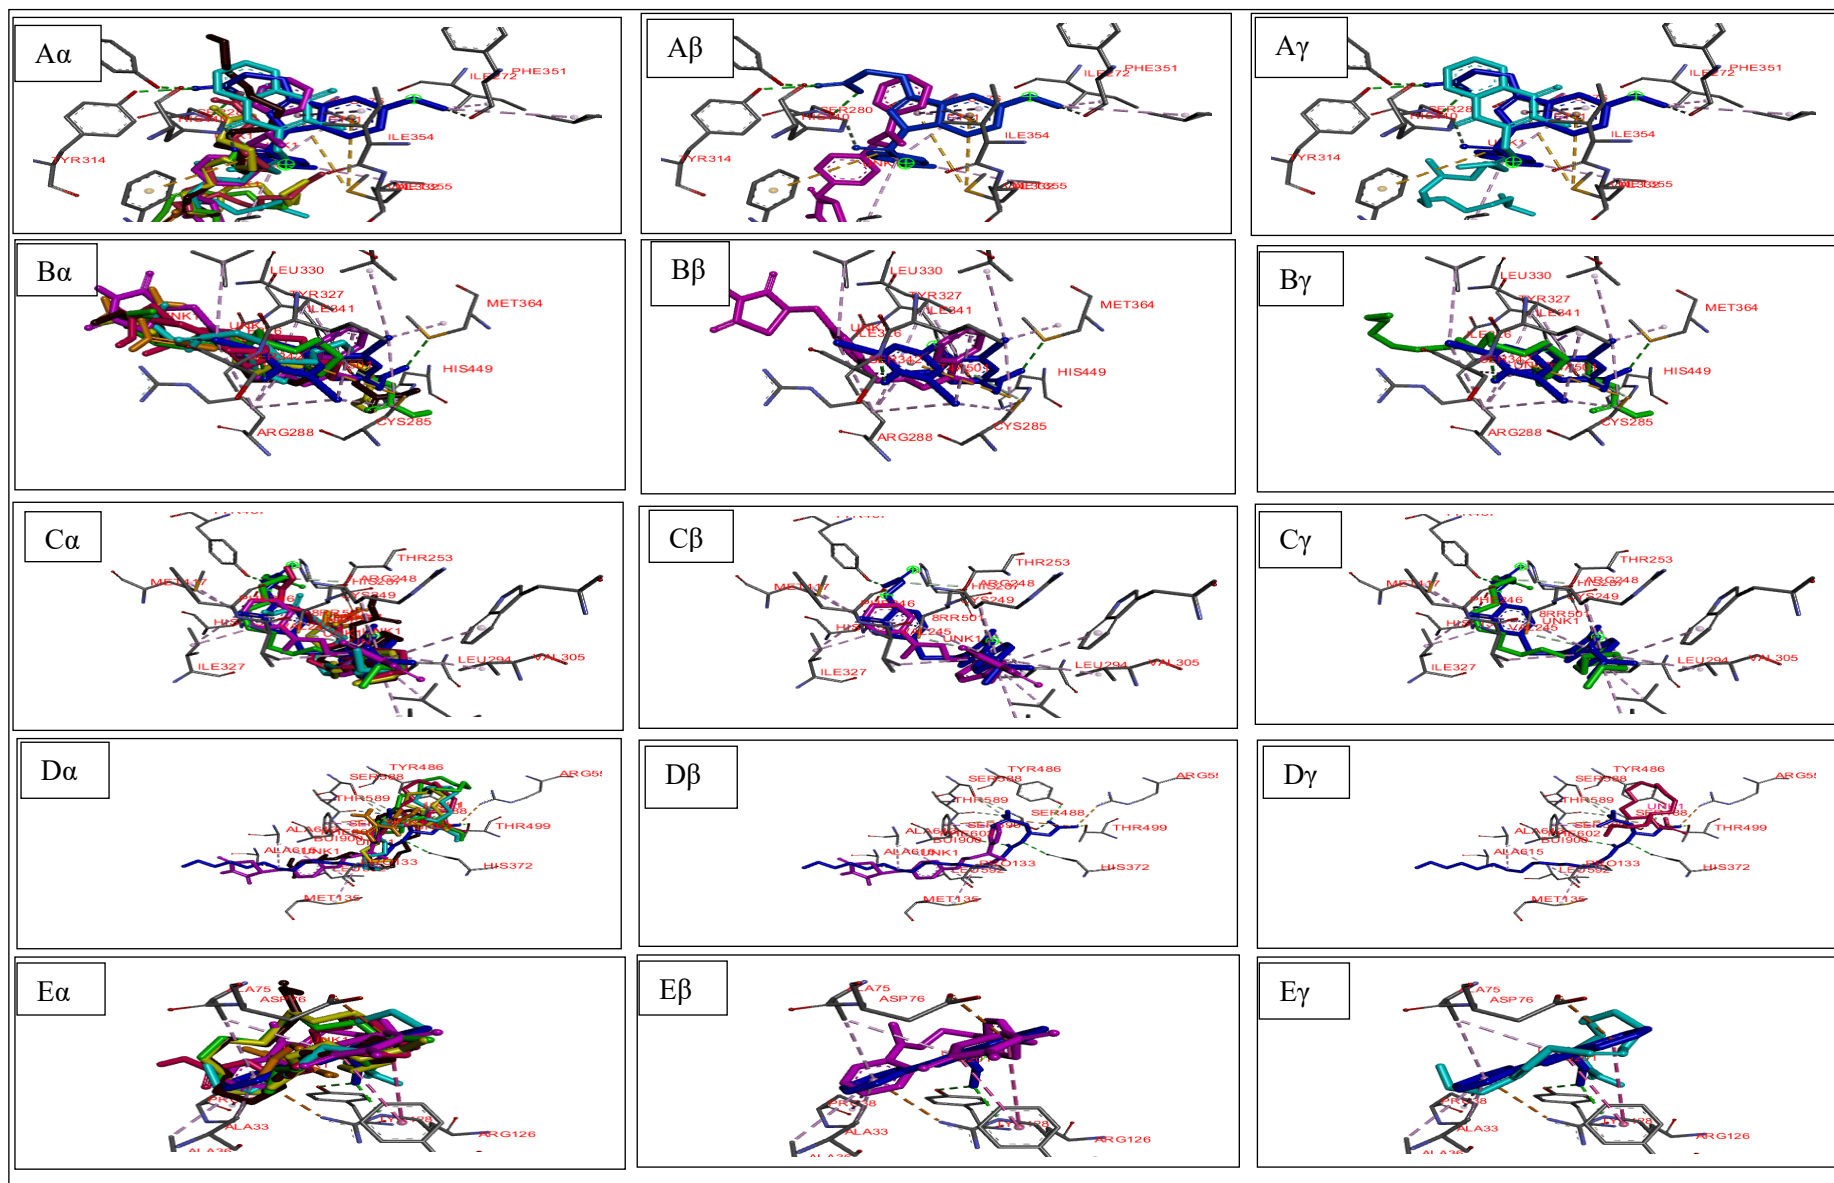

Appendix 1A–E.
